# Supplementary material for: Gram-scale synthesis of nitrogen doped graphene quantum dots for sensitive detection of mercury ions and l-cysteine
Source: Royal Society of Chemistry journal article supplement (doi:10.1039/c9ra06113d), 2019-01-01
Supplement: c9ra06113d1.pdf [file c9ra06113d1.pdf]

## Supporting Information

### TABLES

Table S1 Comparison between fluorescent detection of Hg<sup>2+</sup> using different nanocarbon probe.

| Fluorescent probe | DL<br>( $\mu\text{M}$ ) | Linear range<br>( $\mu\text{M}$ ) | Ref.      |
|-------------------|-------------------------|-----------------------------------|-----------|
| CDs               | 1.3                     | 0-2.69                            | [35]      |
| F-CDs             | 0.02                    | 0.1-1.2                           | [36]      |
| N-CDs             | 0.23                    | 0-25                              | [37]      |
| N,S-CDs           | 0.18                    | 0-20                              | [38]      |
| N,S-CDs           | 2                       | 0-40                              | [39]      |
| N-GQDs            | 0.032                   | 0-5                               | [34]      |
| S,N-GQDs          | 9.14                    | 12-125                            | [40]      |
| N-GQDs            | 2.5                     | 2.5 – 800                         | [41]      |
| RhB-GQDs          | 0.00016                 | 0.001-0.01,50-1000                | [42]      |
| N,S-GQDs          | 0.00014                 | 0.001-0.05,0.05-15                | [43]      |
| N-GQDs            | 0.019                   | 0.05-25                           | This work |

CDs, carbon dots; F-CDs, F doped CDs; N-CDs, N doped CDs; N, S-CDs, N and S co-doped CDs; N-GQDs, N doped GQDs; S,N-GQDs, sulfur and nitrogen co-doped GQDs; RhB-GQDs, Rhodamine B assisted GQDs; N,S-GQDs, N and S co-doped GQDs.

Table S2 Comparison between fluorescent detection of L-Cys using turn-on mode.

| Fluorescent probe                   | DL<br>( $\mu\text{M}$ ) | Linear range<br>( $\mu\text{M}$ ) | Ref.      |
|-------------------------------------|-------------------------|-----------------------------------|-----------|
| N,S-CDs-Fe <sup>3+</sup>            | 0.54                    | 10-200                            | [44]      |
| CDs-Hg <sup>2+</sup>                | 0.29                    | 2-20                              | [45]      |
| N-CDs@V <sub>2</sub> O <sub>5</sub> | 0.05                    | 0.1-15                            | [46]      |
| N-CDs-Hg <sup>2+</sup>              | 0.0458                  | 0-40                              | [47]      |
| Eu-GQDs-Cu <sup>2+</sup>            | 0.310                   | 0.5-50                            | [48]      |
| N-GQDs-Hg <sup>2+</sup>             | 0.0013                  | 0.05–30                           | [49]      |
| N-GQDs-Hg <sup>2+</sup>             | 0.036                   | 0-5                               | [34]      |
| N-GQDs                              | 0.0292                  | 0.1-30                            | This work |

Table S3 Detection of L-Cys in environmental water samples.

| Sample | Concentration ( $\mu\text{M}$ ) |                                  | RSD<br>(n=3, %) | Recovery<br>(%) |
|--------|---------------------------------|----------------------------------|-----------------|-----------------|
|        | Added L-Cys                     | Found by N-GQDs-Hg <sup>2+</sup> |                 |                 |
| 1      | 3.00                            | 2.87, 2.82, 2.78                 | 1.6             | 94.1            |
| 2      | 10.0                            | 9.37, 9.71, 10.0                 | 3.2             | 96.9            |
| 3      | 20.0                            | 19.3, 19.0, 20.4                 | 3.7             | 97.8            |

## FIGURES

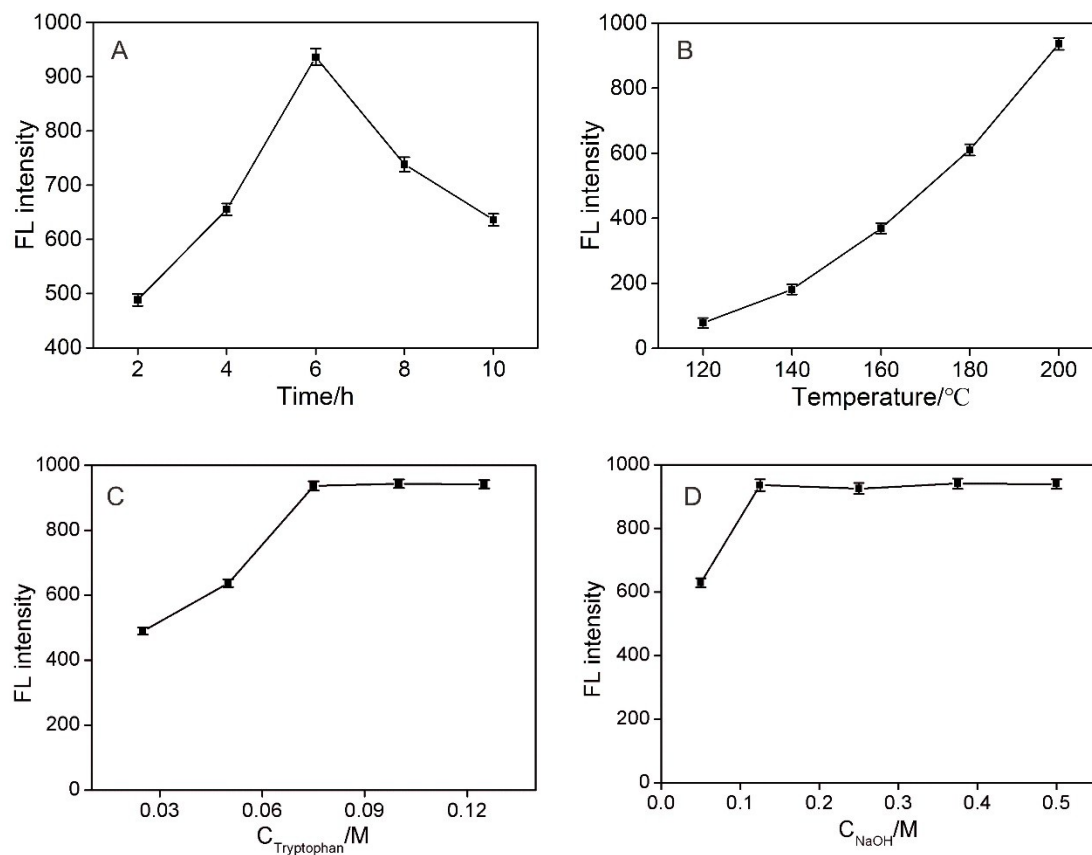

**Fig. S1** FL intensity of N-GQDs prepared using different time (A), temperature (B), concentration of tryptophan (C) or NaOH (D).

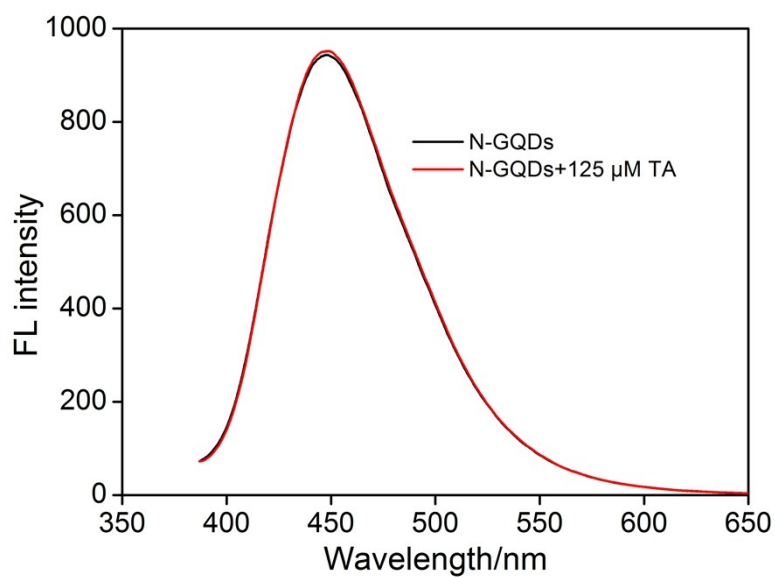

**Fig. S2** FL emission spectra of N-GQDs in the absence and presence of TA (125  $\mu\text{M}$ ).

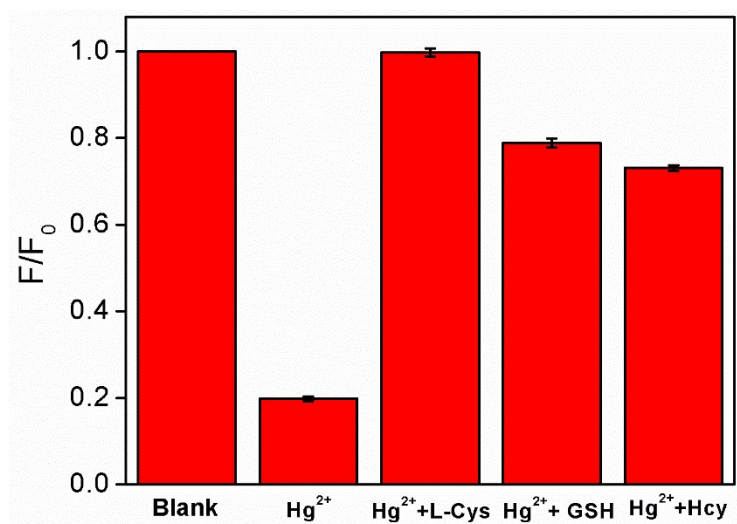

**Fig. S3** The relative FL ratio of N-GQDs with Hg<sup>2+</sup> in the presence of L-Cys, GSH and Hcy.
